# 1 **Comparison of beamformer implementations for MEG source** 2 **localization**

3 Amit Jaiswal<sup>1,2</sup>, Jukka Nenonen<sup>1</sup>, Matti Stenroos<sup>2</sup>, Alexandre Gramfort<sup>3</sup>, Sarang S. Dalal<sup>4</sup>, Britta U. Westner<sup>4</sup>,  
4 Vladimir Litvak<sup>5</sup>, John C. Mosher<sup>6</sup>, Jan-Mathijs Schoffelen<sup>7</sup>, Caroline Witton<sup>9</sup>, Robert Oostenveld<sup>7,8</sup>, Lauri  
5 Parkkonen<sup>1,2</sup>

6 <sup>1</sup>Megin Oy<sup>1</sup>, Helsinki, Finland.

7 <sup>2</sup>Department of Neuroscience and Biomedical Engineering, Aalto University School of Science, Espoo, Finland

8 <sup>3</sup>Inria, CEA/Neurospin, Universite Paris-Saclay, Paris, France

9 <sup>4</sup>Center of Functionally Integrative Neuroscience, Aarhus University, Denmark

10 <sup>5</sup>The Wellcome Centre for Human Neuroimaging, UCL Queen Square Institute of Neurology, London, UK

11 <sup>6</sup>Department of Neurology, University of Texas Health Science Center at Houston, Houston, Texas, USA

12 <sup>7</sup>Donders Institute for Brain, Cognition and Behaviour, Radboud University, Nijmegen, The Netherlands

13 <sup>8</sup>NatMEG, Karolinska Institutet, Stockholm, Sweden

14 <sup>9</sup>Aston Brain Centre, School of Life and Health Sciences, Aston University, Birmingham, UK

15

---

## 16 **Abstract**

17 Beamformers are applied for estimating spatiotemporal characteristics of neuronal sources  
18 underlying measured MEG/EEG signals. Several MEG analysis toolboxes include an  
19 implementation of a linearly constrained minimum-variance (LCMV) beamformer. However,  
20 differences in implementations and in their results complicate the selection and application of  
21 beamformers and may hinder their wider adoption in research and clinical use. Additionally,  
22 combinations of different MEG sensor types (such as magnetometers and planar gradiometers) and  
23 application of preprocessing methods for interference suppression, such as signal space separation  
24 (SSS), can affect the results in different ways for different implementations. So far, a systematic  
25 evaluation of the different implementations has not been performed. Here, we compared the  
26 localization performance of the LCMV beamformer pipelines in four widely used open-source  
27 toolboxes (FieldTrip, SPM12, Brainstorm, and MNE-Python) using datasets both with and without  
28 SSS interference suppression.

29 We analyzed MEG data that were i) simulated, ii) recorded from a static and moving phantom, and  
30 iii) recorded from a healthy volunteer receiving auditory, visual, and somatosensory stimulation. We  
31 also investigated the effects of SSS and the combination of the magnetometer and gradiometer  
32 signals. We quantified how localization error and point-spread volume vary with SNR in all four  
33 toolboxes.

---

<sup>1</sup> Former name: Elekta Oy

34 When applied carefully to MEG data with a typical SNR (3–15 dB), all four toolboxes localized the  
35 sources reliably; however, they differed in their sensitivity to preprocessing parameters. As expected,  
36 localizations were highly unreliable at very low SNR, but we found high localization error also at very  
37 high SNRs. We also found that the SNR improvement offered by SSS led to more accurate  
38 localization.

39 **Keywords**

40 MEG, EEG, source modeling, beamformers, LCMV, open-source analysis toolbox.

41

42

## 43 **1. Introduction**

44 MEG (magnetoencephalography) and EEG (electroencephalography) source imaging aims to  
45 identify the spatiotemporal characteristics of neural source currents based on the recorded signals,  
46 electromagnetic forward models and physiologically motivated assumptions about the source  
47 distribution. One well-known method for estimating a small number of focal sources is to model each  
48 of them as a current dipole with fixed location and fixed or changing orientation. The locations  
49 (optionally orientations) and time courses of the dipoles are then collectively estimated (Mosher et  
50 al., 1992; Hämäläinen et al., 1993). Such equivalent dipole models have been widely applied in basic  
51 research (see e.g. Salmelin, 2010) as well as in clinical practice (Bagic et al., 2011a; 2011b; Burgess  
52 et al., 2011). Distributed source imaging estimates source currents distribution across the whole  
53 source space, typically the cortical surface. Examples of linear methods for distributed source  
54 estimation are LORETA (low-resolution brain electromagnetic tomography; Pascual-Marqui et al.,  
55 1994) and MNE (minimum-norm estimation; Hämäläinen and Ilmoniemi, 1994). From estimated  
56 source distributions, one often computes noise-normalized estimates such as dSPM (dynamic  
57 statistical parametric mapping; Dale et al., 2000). Also, various non-linear distributed inverse  
58 methods have been proposed (Wipf et al., 2010; Gramfort et al., 2013b).

59 While dipole modeling and distributed source imaging estimate source distributions that reconstruct  
60 (the relevant part of) the measurement, beamforming takes an adaptive spatial-filtering approach,  
61 scanning independently each location in a predefined region of interest (ROI) within the source space  
62 without attempting to reconstruct the data. Beamforming can be done in time-or frequency domain;  
63 time-domain methods are typically based on the LCMV approach (Van Veen and Buckley, 1988;  
64 1997; Spencer et al., 1992; Sekihara et al., 2006), and in frequency domain the DICS (Dynamic  
65 Imaging of Coherent Sources) (Gross et al., 2001) approach is popular.

66 The LCMV beamformer estimates the activity for a source at a given location (typically a point  
67 source) while simultaneously suppressing the contributions from all other sources and noise  
68 captured in the data covariance matrix. For evaluation of the spatial distribution of the estimated  
69 source activity, an image is formed by scanning a set of predefined possible source locations and  
70 computing the beamformer output (often power) at each location in the scanning space. When the  
71 scanning is done in a volume grid, the beamformer output is typically presented by superimposing it  
72 onto an anatomical MRI.

73 Beamformers have been popular in basic MEG research studies (e.g. Hillebrand and Barnes, 2005;  
74 Braca et al., 2011; Ishii et al., 2014; van Es and Schoffelen, 2019) as well as in clinical applications  
75 such as in localization of epileptic events (e.g. Van Klink et al., 2017; Yousofzadeh et al., 2018; Hall  
76 et al., 2018). Many variants of beamformers are implemented in several open-source toolboxes and  
77 commercial software for MEG/EEG analysis. Presently, based on citation counts, the most used  
78 open-source toolboxes for MEG data analysis are FieldTrip (Oostenveld et al., 2011), Brainstorm

79 (Tadel et al., 2011), MNE-Python (Gramfort et al., 2013a) and DAiSS in SPM12 (Litvak et al., 2011).  
80 These four toolboxes have an implementation of an LCMV beamformer, based on the same  
81 theoretical framework (van Veen et al., 1997; Sekihara et al., 2006). Yet, it has been anecdotally  
82 reported that these toolboxes may yield different results for the same data. These differences may  
83 arise not only from the core of the beamformer implementation but also from the previous steps in  
84 the analysis pipeline, including data import, preprocessing, forward model computation, combination  
85 of data from different sensor types, covariance estimation, and regularization method. Beamforming  
86 results obtained from the same toolbox may also differ substantially depending on the applied  
87 preprocessing methods; for example, Signal Space Separation (SSS; Taulu and Kajola 2005)  
88 reduces the rank of the data, which could affect beamformer output unpredictably if not appropriately  
89 considered in the implementation.

90 In this study, we evaluated the LCMV beamformer pipelines in the four open-source toolboxes and  
91 investigated the reasons for possible inconsistencies, which hinder the wider adoption of  
92 beamformers to research and clinical use where accurate localization of sources is required, e.g., in  
93 pre-surgical evaluation. These issues motivated us to study the conditions in which these toolboxes  
94 succeed and fail to provide systematic results for the same data and to investigate the underlying  
95 reasons.

96

## 97 **2. Materials and Methods**

### 98 **2.1. Datasets**

99 To compare the beamformer implementations, we employed MEG data obtained from simulations,  
100 phantom measurements, and measurements of a healthy volunteer who received auditory, visual,  
101 and somatosensory stimuli. For all human data recordings, informed consent was obtained from all  
102 study subjects in agreement with the approval of the local ethics committee.

#### 103 **2.1.1. MEG systems**

104 All MEG recordings were performed in a magnetically shielded room with a 306-channel MEG  
105 system (either Elekta Neuromag® VectorView or TRIUX™; Megin Oy, Helsinki, Finland), which  
106 samples the magnetic field distribution by 510 coils at distinct locations above the scalp. The coils  
107 are configured into 306 independent channels arranged on 102 triple-sensor elements, each housing  
108 a magnetometer and two perpendicular planar gradiometers. The location of the phantom or  
109 subject's head relative to the MEG sensor array was determined using four or five head position  
110 indicator (HPI) coils attached to the scalp. A Polhemus Fastrak® system (Colchester, VT, USA) was  
111 used for digitizing three anatomical landmarks (nasion, left and right preauricular points) to define  
112 the head coordinate system. Additionally, the centers of the HPI coils and a set of ~50 additional  
113 points defining the scalp were also digitized. The head position in the MEG helmet was determined  
114 at the beginning of each measurement using the 'single-shot' HPI procedure, where the coils are  
115 activated briefly, and the coil positions are estimated from the measured signals. The location and  
116 orientation of the head with respect to the helmet can then be calculated since the coil locations were  
117 known both in the head and in the device coordinate systems. After this initial head position  
118 measurement, continuous tracking of head movements (cHPI) was engaged by keeping the HPI  
119 coils activated to track the movement continuously.

#### 120 **2.1.2. Simulated MEG data**

121 To obtain realistic MEG data with known sources, we superimposed simulated sensor signals based  
122 on forward modeling of dipolar sources onto measured spontaneous MEG data utilizing a special in-  
123 house simulation software. Structural MRI images, acquired from a healthy adult volunteer using a  
124 3-tesla MRI scanner (Siemens Trio, Erlangen, Germany), were segmented using the MRI  
125 Segmentation Software of Megin Oy (Helsinki, Finland) and the surface enveloping the brain  
126 compartment was tessellated with triangles (5-mm side length). Using this mesh, a realistic single-  
127 shell volume conductor model was constructed using the Boundary Element Method (BEM;  
128 Hämäläinen and Sarvas, 1989) implemented in the Source modeling software of Megin Oy. We also  
129 segmented the cortical mantle with the FreeSurfer software (Dale et al., 1999; Fischl et al., 1999;  
130 Fischl, 2012) for deriving a realistic source space. By using the "ico4" subdivision in MNE-Python,

131 we obtained a source space comprising 2560 dipoles (average spacing 6.2 mm) in each hemisphere  
132 (Fig. 1). Out of these, we selected 25 roughly uniformly distributed source locations in the left  
133 hemisphere for the simulations (Fig. 1). All these points were at least 7.5 mm inwards from the  
134 surface of the volume conductor model. We activated each of the 25 dipoles – one at a time – with  
135 a 10-Hz sinusoid of 200-ms duration (2 cycles). The dipoles were simulated at eight source  
136 amplitudes: 10, 30, 80, 200, 300, 450, 600 and 800 nAm.

137

138 Insert Fig.1 about here

139

140 A continuous resting-state MEG data with eyes open was recorded from the same volunteer who  
141 provided the anatomical data, using an Elekta Neuromag® MEG system (at BioMag Laboratory,  
142 Helsinki, Finland). The recording length was 2 minutes, the sampling rate was 1 kHz, and the  
143 acquisition frequency band was 0.1–330 Hz. This recording provided the head position for the  
144 simulations and defined their noise characteristics. MEG and MRI data were co-registered using the  
145 digitized head shape points and the outer skin surface in the segmented MRI.

146 The simulated sensor-level evoked fields were superimposed on the unprocessed resting-state  
147 recording with inter-trial-interval varying between 1000–1200 ms resulting in ~110 trials (epochs) in  
148 each simulated dataset. The resting-state recording was used both as raw without preprocessing  
149 and after SSS interference suppression. Altogether, we obtained 400 simulated MEG datasets (25  
150 source locations at 8 dipole amplitudes, all both with the raw and SSS-preprocessed real data). Fig.  
151 2 illustrates the generation of simulated MEG data.

152

153 Insert Fig. 2 about here

### 154 **2.1.3. Phantom data**

155 We used a commercial MEG phantom (Megin Oy, Helsinki, Finland) which contains 32 dipoles and  
156 4 HPI coils at distinct fixed locations (see Fig 3a–c and Elekta Neuromag® TRIUX™ User's Manual).  
157 The phantom is based on the triangle construction (Ilmoniemi et al., 1985): an isosceles triangular  
158 line current generates on its relatively very short side a magnetic field distribution equivalent to that  
159 of a tangential current dipole in a spherical conductor model, provided that the vertex of the triangle  
160 and the origin of the model of a conducting sphere coincide. The phantom data were recorded from  
161 8 dipoles, excited one by one (see Elekta Neuromag® TRIUX™ User's Manual), using a 306-channel  
162 TRIUX™ system (at Aston University, Birmingham, UK). The distance from the phantom origin was  
163 64 mm for dipoles 5 and 9 (the shallowest), 54 mm for dipoles 6 and 10, 44 mm for dipoles 7 and

164 11, and 34 mm for dipoles 8 and 12 (the deepest; see Fig 3c). The phantom was first kept stationary  
165 inside the MEG helmet and continuous MEG data were recorded with 1-kHz sampling rate for three  
166 dipole amplitudes (20, 200 and 1000 nAm); one dipole at a time was excited with a 20-Hz sinusoidal  
167 current for 500 ms, followed by 500 ms of inactivity. The recordings were repeated with the 200-nAm  
168 dipole strength while moving the phantom continuously to mimic head movements inside the MEG  
169 helmet; see the movements in Fig. 3e and Suppl. Fig. 2 for all movement parameters.

170

171

Insert Fig. 3 about here

172

#### 173 **2.1.4. Human MEG data**

174 We recorded MEG evoked responses from the same volunteer whose MRI and spontaneous MEG  
175 data were utilized in the simulations. These human data were recorded using a 306-channel Elekta  
176 Neuromag® system (at BioMag Laboratory, Helsinki, Finland). During the MEG acquisition, the  
177 subject was receiving a random sequence of visual (a checkerboard pattern in one of the four  
178 quadrants of the visual field), somatosensory (electric stimulation of the median nerve at the left/right  
179 wrist at the motor threshold) and auditory (1-kHz 50-ms tone pips to the left/right ear) stimuli with an  
180 interstimulus interval of ~500 ms. The Presentation software (Neurobehavioral Systems, Inc.,  
181 Albany, CA, USA) was used to produce the stimuli.

#### 182 **2.2. Preprocessing**

183 The datasets were analyzed in two ways: 1) omitting bad channels from the analysis, without  
184 applying SSS preprocessing, and 2) applying SSS-based preprocessing methods (SSS/tSSS) to  
185 reduce magnetic interference and perform movement compensation for moving phantom data. The  
186 SSS-based preprocessing and movement compensation were performed in MaxFilter™ software  
187 (version 2.2; MEGIN Oy, Helsinki, Finland). After that, the continuous data were bandpass filtered  
188 (passband indicated for each dataset later in the text) followed by the removing the dc. Then the  
189 data were epoched to trials around each stimulus. We applied an automatic trial rejection technique  
190 based on the maximum variance across all channels, rejecting trials that had variance higher than  
191 the 98<sup>th</sup> percentile of the maximum or lower than the 2<sup>nd</sup> percentile (see Suppl. Fig. 4). This method  
192 is available as an optional preprocessing step in FieldTrip, and the same implementation was applied  
193 in the other toolboxes. Below we describe the detailed preprocessing steps for all datasets.

#### 194 **2.2.1. Simulated data**

195 In each toolbox, the raw data with just bad channels removed or SSS-preprocessed continuous data  
196 were filtered using a zero-phase filter with a passband of 2–40 Hz. The filtered data were epoched

197 into windows from  $-200$  to  $+200$  ms relative to the start of the source activity. The bad epochs were  
198 removed using the variance-based automatic trial rejection technique, resulting in  $\sim 100$  epochs.  
199 Then the noise and data covariance matrices were estimated from these epochs for the time  
200 windows of  $-200$  to  $-20$  ms and  $20$  to  $200$  ms, respectively.

### 201 **2.2.2. Phantom data**

202 All 32 datasets (static: 3 dipole strengths and 8 dipole locations; moving: 1 dipole strength and 8  
203 dipole locations) were analyzed both without and with SSS-preprocessing. We applied SSS on static  
204 phantom data to remove external interference. On moving-phantom data, combined temporal SSS  
205 and movement compensation (tSSS\_mc) were applied for suppressing external and movement-  
206 related interference and for transforming the data from the continuously estimated positions into a  
207 static reference position (Taulu and Kajola 2005; Nenonen et al., 2012). Then in each toolbox the  
208 continuous data were filtered to 2–40 Hz using a zero-phase bandpass filter, and the filtered data  
209 were epoched from  $-500$  to  $+500$  ms with respect to stimulus triggers. Bad epochs were removed  
210 using the automated method based on maximum variance, yielding  $\sim 100$  epochs for each dataset.  
211 The noise and data covariance matrices were estimated in each toolbox for the time windows of  $-$   
212  $500$  to  $-50$  ms and  $50$  to  $500$  ms, respectively.

### 213 **2.2.3. Human MEG data**

214 Both the unprocessed raw data and the data preprocessed with tSSS were filtered to 1–95 Hz using  
215 a zero-phase bandpass filter in each toolbox. The trials with somatosensory stimuli (SEF) were  
216 epoched between  $-100$  to  $-10$  and  $10$  to  $100$  ms for estimating the noise and data covariances,  
217 respectively. The corresponding time windows for the auditory-stimulus trials (AEF) were  $-150$  to  $-$   
218  $20$  and  $20$  to  $150$  ms, and for the visual stimulus trials (VEF)  $-200$  to  $-50$  and  $50$  to  $200$  ms,  
219 respectively. Trials contaminated by excessive eye blinks (EOG  $> 250$   $\mu$ V) or by excessive magnetic  
220 signals (MEG  $> 5000$  fT or  $3000$  fT/cm) were removed with the variance-based automated trial  
221 removal technique. Before covariance computation, baseline correction by the time window before  
222 the stimulus was applied on each trial. The covariance matrices were estimated independently in  
223 each toolbox.

224 Since the actual source locations associated with the evoked fields are not precisely known, we  
225 defined reference locations using conventional dipole fitting in the Source Modeling Software of  
226 Megin Oy (Helsinki, Finland). A single equivalent dipole was used to represent SEF and VEF  
227 sources, and one dipole per hemisphere was used for AEF (see Suppl. Fig. 3). The dipole fitting was  
228 performed at the time point of the maximum RMS value across all planar gradiometer channels  
229 (global field power) of the average response amplitude.



#### 230 **2.2.4. Forward model**

231 For the beamformer scan of simulated data, we used the default or the most commonly used forward  
232 model of each toolbox: a single-compartment BEM model in MNE-Python, a single-shell corrected-  
233 sphere model (Nolte, 2003) in FieldTrip, a single-shell corrected sphere model (Nolte, 2003) through  
234 inverse normalization of template meshes (Mattout et al., 2007) in SPM12(DAiSS), and the  
235 overlapping-spheres (Huang et al., 1999) model in Brainstorm. For constructing models for these  
236 forward solutions, the segmentation of MRI images was performed in FreeSurfer for MNE-Python  
237 and Brainstorm while FieldTrip and SPM12 used the SPM segmentation procedure. A volumetric  
238 source space was represented by a rectangular grid with 5-mm resolution and 5-mm minimal  
239 distance from the head model surface. Forward solutions were computed separately in each toolbox  
240 using the head model, the volumetric grid sources, and sensor information from the MEG data. Since  
241 each toolbox prepares a head model using a different method, the shape of the head models may  
242 slightly differ from each other (see Fig. 4) which further may result in a shift between the positions of  
243 the scanning grid in these toolboxes.

244

245 Insert Fig. 4 about here

246

247 For phantom data, a homogeneous spherical volume conductor model was defined in each toolbox  
248 with the origin at the head coordinate system origin. An equidistant rectangular source-point grid with  
249 5-mm resolution was placed inside the upper half of a sphere covering all 32 dipoles of the phantom;  
250 see Fig. 3d. Forward solutions for these grids were computed independently in each toolbox. For  
251 human MEG data, the head models and the source space were defined in the same way as for the  
252 beamformer scanning of the simulated data.

#### 253 **2.3. LCMV beamformer**

254 The linearly constrained minimum-variance (LCMV) beamformer is a spatial filter that relates the  
255 magnetic field measured outside the head to the underlying neural activities using the covariance of  
256 measured signals and models of source activity and signal transfer between the source and the  
257 sensor (Spencer et al., 1992; van Veen et al. 1997; Robinson and Vrba, 1998). The spatial filter  
258 weights are computed for each location in the region of interest (ROI).

259 Let  $\mathbf{x}$  be an  $M \times 1$  signal vector of MEG data measured with  $M$  sensors, and  $N$  is the number of grid  
260 points in the ROI with grid locations  $r_j$ , ( $j = 1, \dots, N$ ). Then the source  $\mathbf{y}(r_j)$  at any location  $r_j$  can be  
261 estimated as weighted combination of the measurement  $\mathbf{x}$  as

$$262 \quad \mathbf{y}(r_j) = \mathbf{W}^T(r_j)\mathbf{x} \quad (1)$$

263 where the  $M \times 3$  matrix  $\mathbf{W}(r_j)$  is known as spatial filter for a source at location  $r_j$ . This type of spatial  
 264 filter provides a *vector type beamformer* by separately estimating the activity for three orthogonal  
 265 source orientations, corresponding to the three columns of the matrix. According to Eqs 16–23 in  
 266 van Veen et al. (1997), the spatial filter  $\mathbf{W}(r_j)$  for vector beamformer is defined as

$$267 \quad \mathbf{W}(r_j) = \left( \mathbf{L}^T(r_j) \mathbf{C}^{-1} \mathbf{L}(r_j) \right)^{-1} \mathbf{L}^T(r_j) \mathbf{C}^{-1} \quad (2)$$

268 Here  $\mathbf{L}(r_j)$  is the  $M \times 3$  local leadfield matrix that defines the contribution of a dipole source at location  
 269  $r_j$  in the measured data  $\mathbf{x}$ , and  $\mathbf{C}$  is the covariance matrix computed from the measured data samples.  
 270 To perform source localization using LCMV, the output variance (or output source power)  $\text{Var}(\mathbf{y}(r_j))$   
 271 is estimated at each point in the source space (see Eq (24) in van Veen et al., 1997), resulting in

$$272 \quad \widehat{\text{Var}}(\mathbf{y}(r_j)) = \text{Trace}\{[\mathbf{L}^T(r_j) \mathbf{C}^{-1} \mathbf{L}(r_j)]^{-1}\} \quad (3)$$

273 Usually, the measured signal is contaminated by non-uniformly distributed noise and therefore the  
 274 estimated signal variance is often normalized with projected noise variance  $\mathbf{C}_n$  calculated over some  
 275 baseline data (noise). Such normalized estimate is called Neural Activity Index (NAI; van Veen et  
 276 al., 1997) and can be expressed as

$$277 \quad \text{NAI}(r_j) = \text{Trace}\{[\mathbf{L}^T(r_j) \mathbf{C}^{-1} \mathbf{L}(r_j)]^{-1}\} / \text{Trace}\{[\mathbf{L}^T(r_j) \mathbf{C}_n^{-1} \mathbf{L}(r_j)]^{-1}\} \quad (4)$$

278 Scanning over all the locations in the region of interest in source space transforms the MEG data  
 279 from a given measurement into an NAI map.

280 In contrast to a vector beamformer, a *scalar beamformer* (Sekihara and Scholz, 1996; Robinson and  
 281 Vrba, 1998) uses constant source orientation that is either pre-fixed or optimized from the input data  
 282 by finding the orientation that maximizes the output source power at each target location. Besides  
 283 simplifying the output, the optimal-orientation scalar beamformer enhances the output SNR  
 284 compared to the vector beamformer (Robinson and Vrba, 1998; Sekihara et al., 2004). The optimal  
 285 orientation  $\eta_{\text{opt}}(r_j)$ , for location  $r_j$  can be determined by generalized eigenvalue decomposition  
 286 (Sekihara et al., 2004) using Rayleigh–Ritz formulation as

$$287 \quad \eta_{\text{opt}}(r_j) = \mathbf{v}_{\min}\{\mathbf{L}^T(r_j) \mathbf{C}^{-2} \mathbf{L}(r_j), \mathbf{L}^T(r_j) \mathbf{C}^{-1} \mathbf{L}(r_j)\} \quad (5)$$

288 where  $\mathbf{v}_{\min}$  indicates the eigenvector corresponding to the smallest generalized eigenvalue of the  
 289 matrices enclosed in Eq (5) curly braces. For further details, see Eq (4.44) and Section 13.3 in  
 290 Sekihara and Nagarajan (2008).

291 Denoting  $\mathbf{I}_{\eta_{\text{opt}}}(r_j) = \mathbf{L}(r_j) \boldsymbol{\eta}_{\text{opt}}(r_j)$  instead of  $\mathbf{L}(r_j)$ , the weight matrix in Eq (2) becomes  $M \times 1$  weight  
 292 vector  $\mathbf{w}(r_j)$ ,

$$293 \quad \mathbf{w}(r_j) = \left( \mathbf{I}_{\eta_{\text{opt}}}^T(r_j) \mathbf{C}^{-1} \mathbf{I}_{\eta_{\text{opt}}}(r_j) \right)^{-1} \mathbf{I}_{\eta_{\text{opt}}}^T(r_j) \mathbf{C}^{-1} \quad (6)$$

294 Using  $\mathbf{I}_{\eta_{\text{opt}}}(r_j)$  in Eq (4), we find the estimate (NAI) of a scalar LCMV beamformer as

$$295 \quad NAI(r_j) = \mathbf{I}_{\eta_{\text{opt}}}^T(r_j) \mathbf{C}_n^{-1} \mathbf{I}_{\eta_{\text{opt}}}(r_j) / \mathbf{I}_{\eta_{\text{opt}}}^T(r_j) \mathbf{C}^{-1} \mathbf{I}_{\eta_{\text{opt}}}(r_j) \quad (7)$$

296 When the data covariance matrix is estimated from a sufficiently large number of samples and it has  
297 full rank, Eq (7) provides the maximum spatial resolution (Lin et al., 2008; Sekihara and Nagarajan,  
298 2008). According to van Veen and colleagues (1997), the number of samples for covariance  
299 estimation should be at least three times the number of sensors. Thus, sometimes, the amount of  
300 available data may be insufficient to obtain a good estimate of the covariance matrices. In addition,  
301 pre-processing methods such as signal-space projection (SSP) or signal-space separation (SSS)  
302 reduce the rank of the data, which impacts the matrix inversions in Eq (7). These problems can be  
303 mitigated using Tikhonov regularization (Tikhonov, 1963) by replacing matrix  $\mathbf{C}^{-1}$  by its regularized  
304 version  $(\mathbf{C} + \lambda \mathbf{I})^{-1}$  in Eqs (2–7) where  $\lambda$  is called the regularization parameter.

305 All tested toolboxes set the  $\lambda$  with respect to the mean data variance, using ratio 0.05 as default:

$$306 \quad \lambda = 0.05 \times \text{Trace}(\mathbf{C}) / M$$

307 If the data are not full rank, also the noise covariance matrix  $\mathbf{C}_n$  needs to be regularized.

## 308 **2.4. Differences between the beamformer pipelines**

309 Though all the four toolboxes evaluated here use the same theoretical framework of the LCMV  
310 beamformer, there are several implementation differences which might affect the exact outcome of  
311 a beamformer analysis pipeline. Many of these differences pertain to specific handling of the data  
312 prior to the estimation of the spatial filters, or to specific ways of (post)processing the beamformer  
313 output. Some of the toolbox-specific features reflect the characteristics of the MEG system around  
314 which the toolbox has evolved. Importantly, some of these differences are sensitive to input SNR,  
315 and they can lead to differences in the results. Table 1 lists the main characteristics and settings of  
316 the four toolboxes used in this study. We used the default settings of each toolbox (general practice)  
317 for steps before beamforming but set the actual beamforming steps as similar as possible across  
318 the toolboxes to be able to meaningfully compare the results.

319 [Insert Table 1 about here](#)

320 All toolboxes import data using either Matlab or Python import functions of the MNE software  
321 (Gramfort et al., 2014) but represent the data internally either in T or fT (magnetometer) and T/m or  
322 fT/mm (gradiometer); see Suppl. Fig. 5. Default filtering approaches across toolboxes change the  
323 numeric values, so the linear correlation between the same channels across toolboxes deviates from  
324 the identity line; see Suppl. Fig. 6. The default head model is also different across toolboxes; see

325 Section 2.2.4. The single-shell BEM and single-shell corrected sphere model (the “Nolte model”) are  
326 approximately as accurate but produce slightly different results (Stenroos et al., 2014).

327 For MEG–MRI co-registration, there are several approaches available across these toolboxes such  
328 as an interactive method using fiducial or/and digitization points defining the head surface, using  
329 automated point cloud registration methods e.g., the iterative closest point (ICP) algorithm. Despite  
330 using the same source-space specifications (rectangular grid with 5-mm resolution), differences in  
331 head models and/or co-registration methods change the forward model across toolboxes; see Fig. 4.  
332 Though there are several approaches to compute data and noise covariances across the four  
333 beamformer implementations, by default they all use the empirical/sample covariance. In contrast to  
334 other toolboxes, Brainstorm eliminates the cross-modality terms from the data and noise covariance  
335 matrices. Also, the regularization parameter  $\lambda$  is calculated and applied separately for gradiometers  
336 and magnetometers channel sets in Brainstorm.

337 The combination of two MEG sensor types in the MEGIN triple-sensor array causes additional  
338 processing differences in comparison to other MEG systems that employ only axial gradiometers or  
339 only magnetometers. Magnetometers and planar gradiometers have different dynamic ranges and  
340 measurement units, so their combination must be appropriately addressed in source analysis such  
341 as beamforming. For handling the two sensor types in the analysis, different strategies are used for  
342 bringing the channels into the same numerical range. MNE-Python and Brainstorm use pre-  
343 whitening (Engemann et al., 2015; Ilmoniemi and Sarvas, 2019) based on noise covariance while  
344 FieldTrip and SPM12 assume a single sensor type for all the MEG channels. This approach makes  
345 SPM12 to favor magnetometer data (with higher numeric values of magnetometer channels) and  
346 FieldTrip to favor gradiometer data (with higher numeric values of gradiometer channels). However,  
347 users of FieldTrip and SPM12 usually employ only one channel type of the triple-sensor array for  
348 beamforming (most commonly, the gradiometers). Due to the presence of two different sensor types  
349 in the MEGIN systems and the potential use of SSS methods, the eigenspectra of data from these  
350 systems can be idiosyncratic (see Suppl. Fig. 7) and differ from the single-sensor type MEG systems.  
351 Rank deficiency and related phenomena are potential sources of beamforming failures with data that  
352 have been cleaned with a method such as SSS.

353 Previous studies have shown that the scalar beamformer yields twofold higher output SNR compared  
354 to the vector-type beamformer, if the source orientation for the scalar beamformer has been  
355 optimized according to Eq 5 (Vrba J., 2000; Sekihara et al., 2004). Most of the beamformer analysis  
356 toolboxes have an implementation of optimal-orientation scalar beamformer. In this study, we used  
357 the scalar beamformer in MNE-Python, FieldTrip, and SPM12 but a vector-beamformer in Brainstorm  
358 since the orientation optimization was not available. To keep the output dimensionality the same  
359 across the toolboxes, we linearly summed the three-dimensional NAI values at each source location.

360 The general workflow for analysis pipelines across toolboxes used in this study is illustrated in Suppl.  
361 Fig. 8.

## 362 **2.5. Metrics used in comparison**

363 In this study, a single focal source could be assumed to underlie the simulated/measured data. In  
364 such studies, accurate localization of the source is typically desired. We calculated two metrics for  
365 comparing the characteristics of the LCMV beamformer results from the four toolboxes: localization  
366 error, and point spread volume. We also analyzed their dependence on input signal-to-noise ratio.

367 **Localization Error (LE):** True source locations were known for the simulated and phantom MEG  
368 data and served as reference locations in the comparisons. Since the exact source locations for the  
369 human subject MEG data were unknown, we applied the location of a single current dipole as a  
370 reference location (see Section 2.1.4 “Human MEG data”). The Source Modelling Software (Megin  
371 Oy, Helsinki, Finland) was used to fit a single dipole for each evoked-response category at the time  
372 point around the peak of the average response providing the maximum goodness-of-fit value. The  
373 beamformer localization error is computed as the Euclidean distance between the estimated and  
374 reference source locations.

375 **Point-Spread Volume (PSV):** An ideal spatial filter should provide a unit response at the actual  
376 source location and zero response elsewhere. Due to noise and limited spatial selectivity, there is  
377 some filter leakage to the nearby locations, which spreads the estimated variance over a volume.  
378 The focality of the estimated source, also called focal width, depends on several factors such as the  
379 source strength, orientation, and distance from the sensors. PSV measures the focality of an  
380 estimate and is defined as the total volume occupied by the source activity above a threshold value;  
381 thus, a smaller PSV value indicates a more focal source estimate. We fixed the threshold to 50% of  
382 the highest NAI in all comparisons. In this study, the volume represented by a single source in any  
383 of the four source spaces (5-mm grid spacing) was 125 mm<sup>3</sup>.

384 **Signal-to-Noise ratio (SNR):** Beamformer localization error depends on the input SNR, which varies  
385 – among other factors – as a function of source strength and distance of the source from the sensor  
386 array. Therefore, we evaluated beamformer localization errors and PSV as a function of the input  
387 SNR of the evoked field data.

388 We estimated the SNR for each evoked field MEG dataset in MNE-Python using the estimated noise  
389 covariance as follows: The data were whitened using the noise covariance and the effective number  
390 of sensors was then calculated as

$$391 \quad N = M - \sum(\sigma_n \leq 0) \quad (8)$$

392 where  $\sigma_n$  are the eigenvalues of noise covariance matrix  $\mathbf{C}_n$ .

393 Then, the input SNR was calculated as:

394 
$$\text{SNR}_{\text{dB}} = 10 \log_{10} \left( \left[ \frac{1}{N} \sum_{k=1}^M \mathbf{x}_k^2(t) \right]_{t_{\text{max}}} \right) \quad (9)$$

395 where  $x_k(t)$  is the signal on the  $k^{\text{th}}$  sensor,  $M$  is the total number of sensors in the measurement,  
396  $t_{\text{max}}$  is the time point at maximum amplitude of whitened data across all channels and  $N$  is the  
397 number of effective sensors defined in Eq (8). Since the same data were used in all toolboxes, we  
398 used the same input SNR value for all of them.

## 399 **2.6. Data and code availability**

400 The codes we wrote to conduct these analyses are publicly available under a repository  
401 <https://zenodo.org/record/3471758> (DOI: 10.5281/zenodo.3471758). The datasets as well as the  
402 specific versions of the four toolboxes used in the study are available at  
403 <https://zenodo.org/record/3233557> (DOI: 10.5281/zenodo.3233557).

404

### 405 **3. Results**

406 We computed the source localization error (LE) and the point spread volume (PSV) for each NAI  
407 estimate across all datasets from LCMV beamformer in all four toolboxes. We plotted the LE and  
408 PSV as a function of the input SNR computed according to Eq (9). To differentiate the localization  
409 among the implementations, we followed the following color convention: *MNE-Python: grey;*  
410 *FieldTrip: Lavender; SPM12 (DAiSS): Mint; and Brainstorm: coral.*

#### 411 **3.1. Simulated MEG data**

412 Localization errors and PSV values were calculated for all simulated datasets and plotted against  
413 the corresponding input SNR. The SNR of all 200 simulated datasets ranged between 0.5 to 25 dB.  
414 Fig. 5a shows the plots between localization error and input SNR of each simulated dataset. The  
415 polynomial regressions of the maximum localization errors across LCMV implementations show the  
416 variation of localization errors over the range of input SNRs. The localization error goes high for all  
417 toolboxes for very low SNR (< 3 dB) signals (e.g. 20-nAm or deep sources). The localization error  
418 within the input SNR range 3–12 dB is stable and mostly within 15 mm, and SSS preprocessing  
419 widens this SNR range of stable performance to 3–15 dB. Unexpectedly, we also found high  
420 localization error at high SNR (> 15 dB) for the toolboxes other than SPM12 (DAiSS). Fig. 5b plots  
421 PSV values against input SNR for raw and SSS-preprocessed simulated data. The polynomial  
422 regression plots fit a nonlinear relationship between the input SNR and the corresponding maximal  
423 PSVs across the four LCMV implementations. The regression plots in Fig. 5b agree with the  
424 corresponding plots in Fig. 5a, i.e., lower PSV values (higher spatial resolution) for the SNR range  
425 with smaller localization errors and vice-versa, for all toolboxes. The low SNR signals (usually, weak  
426 or deep sources) shows high PSV values in Fig. 5b which also indicates improved spatial resolution  
427 after SSS preprocessing. Fig. 5a–b shows that none of the four toolboxes provides accurate  
428 localization for all SNR values and that the spatial resolution of LCMV is dependent on input SNR.  
429 SPM12 (DAiSS) shows lower localization errors and PSV values at very high SNR too.

430 Insert Fig. 5 about here

431

#### 432 **3.2. Static and moving phantom MEG data**

433 In the case of phantom data, the background noise is very low and there is a single source  
434 underneath a measurement. Also, the phantom analysis uses a homogeneous sphere model that  
435 does not introduce any forward model inaccuracy, except the possible co-registration error. All four  
436 toolboxes show high localization accuracy and high resolution for phantom data, if the input SNR is  
437 not very low. Corresponding results for the static phantom data are presented in Fig. 6a–b. Fig. 6a  
438 indicates the localization error clear dependency on SNR. The nonlinear regression plots fitted over  
439 maximum localization errors indicate high localization errors at very low SNR raw data sets. The

440 high error is because of some unfiltered artifacts in raw data which was removed by SSS. After SSS,  
441 the beamformer shows localization error under ~5 mm for all the datasets. Fig. 6b shows the  
442 beamforming resolution in terms of PSV. The regression plots fitted over maximum PSV values show  
443 a high spatial resolution for the data with SNR > 5 dB.

444

445

Insert Fig. 6 about here

446

447 In the cases of moving phantom, Fig. 7a shows high localization errors with unprocessed raw data  
448 because of disturbances caused by the movement. The dipole excitation amplitude was 200 nAm,  
449 which is enough to provide a good SNR. The most superficial dipoles (Dipoles 5 and 9 in Fig. 3c)  
450 possess higher SNR but also higher localization error since they get more significant angular  
451 displacement during movement. Because of differences in implementations and preprocessing  
452 parameters listed in Section 2.4, apparent differences among the estimated localization error can be  
453 seen. Overall, MNE-Python shows the lowest while SPM12 (DAiSS) shows the highest localization  
454 error with the phantom data with movement artifact. After applying for spatiotemporal tSSS and  
455 movement compensation, the improved SNR provided significantly better localization accuracies.  
456 Fig. 7b shows the PSV for moving phantom data for raw and processed data. The regression plots  
457 indicate improvement in SNR and spatial resolution after tSSS with movement compensation.

458

459

Insert Fig. 7 about here

460

### 461 **3.3. Human subject MEG data**

462 Since the correct source locations for the human evoked field datasets are unknown, we plotted the  
463 localization difference across the four LCMV implementations for each data. These localization  
464 differences were the Cartesian distance between an LCMV-estimated location and the  
465 corresponding reference dipole location as explained in Section 2.1.4. Fig. 8a shows the plots for  
466 the localization differences against the input SNRs computed using Eq (9) for four visual, two  
467 auditory and two somatosensory evoked-field datasets. The localization differences for both  
468 unprocessed raw and SSS preprocessed data are mostly under 20 mm in each toolbox. The higher  
469 differences compared to the phantom and simulated dataset could be because of two reasons. First,  
470 the recording might have been comprised by some head movement, which could not be corrected  
471 because of the lack of continuous HPI. Second, the reference dipole location may not represent the  
472 very same source as estimated by the LCMV beamformer. In contrast to dipole fitting, beamforming  
473 utilizes data from the full covariance window, so some difference between the estimated localizations



474 is to be expected. For all SSS-preprocessed evoked field datasets, Fig. 8b shows the estimated  
475 locations across the four LCMV implementation and the corresponding reference dipole locations.  
476 For simplifying the visualization, all estimated locations in a stimulus category are projected onto a  
477 single axial slice. All localizations seem to be in the correct anatomical regions, except the estimated  
478 location from right-ear auditory responses by MNE-Python after SSS-preprocessing (Fig. 8b; red  
479 circle). After de-selecting the channels close to the right auditory cortex, the MNE-Python-estimated  
480 source location was correctly in the left cortex (Fig. 8b; green circle). The regression plots fitted over  
481 the maxima of the localization differences across the LCMV implementations show the improvement  
482 in input SNR and also localization improvement in some cases. Fig. 9 in Supplementary material  
483 shows the PSV values as a function of the input SNR for the evoked-field datasets, demonstrating  
484 the spatial resolution of beamforming.

485

486

Insert Fig. 8 about here

487

488

## 489 **4. Discussion**

490 The localization accuracy and beamformer resolution as a function of the input SNR were  
491 investigated and compared across the LCMV implementations in the four tested toolboxes. In the  
492 absence of background noise, the phantom data showed high localization accuracy and high spatial  
493 resolution if the input SNR  $> \sim 5$  dB. All implementations also showed high localization accuracy for  
494 data recording from a moving phantom after compensating the movement and applying tSSS. For  
495 the simulated datasets with realistic background noise, the regression curve fitted over the maximum  
496 localization error across the LCMV implementations indicates that the reliability of localization  
497 accuracy in these implementations depends on the SNR of input data and these implementations  
498 localize a single source reliably within the SNR range of  $\sim 3$ –15 dB. Small differences among the  
499 estimated source locations across the implementations even in this SNR range are caused by  
500 differing processing steps in defining the head model, spatial filter and performing the beamformer  
501 scan. For the human subject evoked-field MEG data, all implementations localize sources within  
502 about 20 mm.

503 Our results indicate that with the default parameter settings, none of the four implementations works  
504 universally reliable for all datasets and input SNR values. In the case of low SNR (typically less than  
505 3 dB), the lower contrast between data and noise covariance may cause the beamformer scan to  
506 provide a flat peak in the output and so the localization error goes high. Unexpectedly, we found high  
507 localization error for high SNR signal and significant differences between the toolboxes. The  
508 regression curves fitted over averaged maximum PSV across all toolboxes showed higher values  
509 for low- and high-SNR simulated data. As expected, reliable localization provides higher spatial  
510 resolution across the implementations and vice-versa (Fig. 5 and 6). The lower spatial resolution  
511 (higher PSV) for the signal with low SNR also agrees with previous studies (Lin et al., 2008;  
512 Hillebrand and Barnes, 2003). We further discuss here the significant steps of the beamformer  
513 pipelines, which affect the localization accuracy and introduce discrepancies among the  
514 implementations.

### 515 **4.1 Preprocessing with SSS**

516 Due to the spatial-filter nature of the beamformer, it can reject external interference and therefore  
517 SSS-based pre-processing may have little effect on the results. Thus, although the SNR increases  
518 as a result of applying SSS, the localization accuracy does not necessarily improve, which is evident  
519 in the localization of the evoked responses (Fig. 8).

520 However, undetected artifacts, such as a large-amplitude signal jump in a single sensor, may in SSS  
521 processing spread to neighboring channels and subsequently reduce data quality. Therefore,  
522 channels with distinct artifacts should be noted and marked as bad prior to beamforming of  
523 unprocessed data or before applying SSS operations. In addition, trials with large artifacts should be  
524 removed based on an amplitude thresholding or by other means. Furthermore, SSS processing of

525 extremely weak signals ( $\text{SNR} < \sim 2$  dB) may not improve the SNR for producing smaller localization  
526 errors and PSV values. Hence the data quality should be carefully inspected before and after  
527 applying preprocessing methods such as SSS, and channels or trials with low-quality data (or lower  
528 contrast) should be omitted from the covariance estimation.

#### 529 **4.2. Effect of filtering and artifact-removal methods**

530 All four toolboxes we tested employ either a MATLAB or Python implementation of the same MNE  
531 routines (Gramfort et al. 2014) for reading FIFF data files and thus have internally the exact same  
532 data at the very first stage (see Suppl. Fig. 6). The data import either keeps the data in SI-units (T  
533 for magnetometers and T/m for gradiometers) or rescales the data (fT and fT/mm) before further  
534 processing. The actual pre-processing steps in the pipeline may contribute to differences in the  
535 results. The filtering step is performed to remove frequency components of no interest, such as slow  
536 drifts, from the data. By default, FieldTrip and SPM use an IIR (Butterworth) filter, and MNE-Python  
537 uses FIR filters. The power spectra of these filters' output signals show notable differences and the  
538 output data from these two filters are not identical. Significant variations can be found between MNE-  
539 Python-filtered and FieldTrip/SPM-filtered data. Although SPM and FieldTrip use the same filter  
540 implementation, the filtering results are not identical because of numeric differences caused by  
541 different channel scaling (Suppl. Fig 6). These differences affect the estimated covariance matrices,  
542 which are a crucial ingredient for the spatial-filter computation and finally may contribute to  
543 differences in beamforming results.

#### 544 **4.3. Effect of SNR on localization accuracy**

545 We reduced the impact of the unknown source depth and strength to a well-defined metrics in terms  
546 of the SNR. We observed that the localization accuracy is poor for very low SNR values, i.e. below  
547 3 dB. The weaker, as well as the deeper sources, project less power on to the sensor array and thus  
548 show lower SNR; see Eq (9). On the other hand, the LCMV beamformer may also fail to localize  
549 accurately sources that produce very high SNR values, likely because the data covariance matrix is  
550 over-fitted, or the scanning grid is too sparse with respect to the point spread of the beamformer  
551 output. In this case the output is too focal and a small error in forward solution, introduced for  
552 example by inaccurate coregistration, may lead to missing the true focal source and obtaining nearly  
553 equal power estimates at many source locations, increasing the chance of mislocalization. Usually,  
554 such high levels of SNR do not occur in typical human MEG experiments, however, the strength of  
555 equivalent current dipoles (ECD) for interictal epileptiform discharges (IIEDs) typically ranges  
556 between 50 and 500 nAm (Bagic et al., 2011a).

557 All four beamformer pipelines provided very similar results when the SNR is in the "suitable range"  
558 of about  $\sim 3$ – $15$  dB. Unsatisfactory performance is typically due to the data; either the SNR is  
559 extremely low, or there are some uncorrected artifacts in the data. The results of the phantom data

560 showed that all toolboxes provide equally good results if there are no uncorrected large artifacts in  
561 the data and if the SNR is not extremely small or large.

#### 562 **4.4. Effect of the head model**

563 Forward modelling requires MEG–MRI co-registration, segmentation of the head MRI and leadfield  
564 computation for the source space. The four beamformer implementations use different approaches,  
565 or similar approaches but with different parameters, which yields slightly different forward models.  
566 From Eqs (2–7), it is evident that beamformers are quite sensitive to the forward model. Hillebrand  
567 and Barnes (2003) showed that the spatial resolution and the localization accuracy of a beamformer  
568 improve with accuracy of the forward model. Dalal and colleagues (2014) reported that co-  
569 registration errors contribute greatly to EEG localization inaccuracy, likely due to their ultimate impact  
570 on head-model quality. Chella and colleagues (2019) presented the dependency of beamformer-  
571 based functional connectivity estimates on MEG-MRI co-registration accuracy.

572 The increasing inter-toolbox localization differences towards very low and very high input SNR is  
573 also subject to the differences between the head models. Fig. 4 shows the three overlapped head  
574 models prepared from the same MRI where a slight misalignment among head models can be easily  
575 seen. This misalignment also affects source space. These differences in head models and thus in  
576 forward solutions will contribute to differences in beamforming results across the toolboxes.

#### 577 **4.5. Covariance matrix**

578 The data covariance matrix is a key component of the adaptive spatial filter in LCMV beamforming,  
579 and any error in covariance estimation can cause an error in source estimation. We used 5% of the  
580 mean variance of all sensors to regularize data covariance for making its inversion stable in FieldTrip,  
581 SPM12 and MNE-Python. Brainstorm uses a slightly different approach and applies regularization  
582 with 5% of mean variance of gradiometer and magnetometer channel sets separately and eliminate  
583 cross-sensor-type entries from the covariance matrices. As SSS preprocessing reduces the rank of  
584 the data, usually retaining at most 75 non-zero eigenvalues, the trace of the covariance matrix  
585 decreases strongly. At very high SNRs ( $> 15$  dB), overfitting of the covariance matrix becomes more  
586 prominent; the condition number (ratio of the largest and the smallest eigenvalues) of the covariance  
587 matrix becomes very high even after the default regularization, which can deteriorate the quality of  
588 source estimates unless the covariance is appropriately regularized. Therefore, the seemingly same  
589 5% regularization can have very different effects before and after SSS; see Suppl. Fig. 7. Thus, the  
590 commonly used way of specifying the regularization level might not be appropriate to produce a good  
591 and stable covariance model at high SNR, and this could be one of the explanations for the  
592 anecdotally reported detrimental effects of SSS on beamforming results.

## 593 **5. Conclusion**

594 We conclude that with the current versions of LCMV beamformer implementations in the four open-  
595 source toolboxes — FieldTrip, SPM12(DAiSS), Brainstorm, and MNE-Python — the localization  
596 accuracy is acceptable (within ~10 mm for a true point source) for most purposes when the input  
597 SNR is 3–15 dB. Lower or higher SNR may compromise the localization accuracy and spatial  
598 resolution. To extend this useable range, a properly defined scaling strategy such as pre-whitening  
599 should be implemented across the toolboxes. The default regularization is often inadequate and may  
600 yield suboptimal results. Therefore, a data-driven approach for regularization should be adopted to  
601 alleviate problems with low- and high-SNR cases. Our further work will be focusing on optimizing  
602 regularization using a more data-driven approach.

603

## 604 **Acknowledgment**

605 This study has been supported by the European Union H2020 MSCA-ITN-2014-ETN program,  
606 Advancing brain research in Children’s developmental neurocognitive disorders project (ChildBrain  
607 #641652). SSD and BUW have been supported by an ERC Starting Grant (#640448).

608

## 609 **References**

- 610 Bagic, A. I., Knowlton, R. C., Rose, D. F., Ebersole, J. S., & ACMEGS Clinical Practice Guideline  
611 (CPG) Committee. (2011a). American clinical magnetoencephalography society clinical practice  
612 guideline 1: recording and analysis of spontaneous cerebral activity. *J Clin Neurophysiol.* **28**(4): 348–  
613 354. <http://dx.doi.org/10.1097/WNP.0b013e3182272fed>
- 614 Bagic, A. I., Knowlton, R. C., Rose, D. F., Ebersole, J. S., & ACMEGS Clinical Practice Guideline  
615 (CPG) Committee. (2011b). American Clinical Magnetoencephalography Society Clinical Practice  
616 Guideline 3: MEG–EEG Reporting. *J Clin Neurophysiol.* **28**(4): 362–365.  
617 <http://dx.doi.org/10.1097/WNO.0b013e3181cde4ad>
- 618 Barca, L., Cornelissen, P., Simpson, M., Urooj, U., Woods, W., & Ellis, A. W. (2011). The neural  
619 basis of the right visual field advantage in reading: an MEG analysis using virtual electrodes. *Brain*  
620 *Lang* **118**(3): 53–71. <http://dx.doi.org/10.1016/j.bandl.2010.09.003>
- 621 Burgess, R. C., Funke, M. E., Bowyer, S. M., Lewine, J. D., Kirsch, H. E., Bagić, A. I., & ACMEGS  
622 Clinical Practice Guideline (CPG) Committee (2011). American Clinical Magnetoencephalography  
623 Society Clinical Practice Guideline 2: Presurgical functional brain mapping using magnetic evoked  
624 fields. *J Clin Neurophysiol.* **28**(4): 355–361. <http://dx.doi.org/10.1097/WNP.0b013e3182272ffe>

- 625 Chella, F., Marzetti, L., Stenroos, M., Parkkonen, L., Ilmoniemi, R. J., Romani, G. L., & Pizzella, V.  
626 (2019). The impact of improved MEG–MRI co-registration on MEG connectivity analysis.  
627 *NeuroImage*, **197**: 354–367. <https://doi.org/10.1016/j.neuroimage.2019.04.061>
- 628 Dalal, S. S., Rampp, S., Willomitzer, F., & Ettl, S. (2014). Consequences of EEG electrode position  
629 error on ultimate beamformer source reconstruction performance. *Front Neurosci.* **8**: 42.  
630 <http://dx.doi.org/10.3389/fnins.2014.00042>
- 631 Dale, A. M., Fischl, B., & Sereno, M. I. (1999). Cortical surface-based analysis I: Segmentation and  
632 surface reconstruction. *Neuroimage* **9**(2): 179–194. <https://doi.org/10.1006/nimg.1998.0395>
- 633 Dale, A. M., Liu, A. K., Fischl, B. R., Buckner, R. L., Belliveau, J. W., Lewine, J. D., & Halgren, E.  
634 (2000). Dynamic statistical parametric mapping: combining fMRI and MEG for high-resolution  
635 imaging of cortical activity. *Neuron* **26**(1): 55–67. [http://dx.doi.org/10.1016/S0896-6273\(00\)81138-1](http://dx.doi.org/10.1016/S0896-6273(00)81138-1)
- 636 Elekta Neuromag® TRIUX User’s Manual, (Megin Oy, 2018)
- 637 Engemann, D. A., & Gramfort, A. (2015). Automated model selection in covariance estimation and  
638 spatial whitening of MEG and EEG signals. *NeuroImage* **108**: 328–342.  
639 <http://dx.doi.org/10.1016/j.neuroimage.2014.12.040>
- 640 Fischl, B. (2012). FreeSurfer. *Neuroimage* **62**(2): 774–781.  
641 <https://doi.org/10.1016/j.neuroimage.2012.01.021>
- 642 Fischl, B., Sereno, M. I. & Dale, A. M. (1999). Cortical surface-based analysis II: Inflation, flattening,  
643 and a surface-based coordinate system. *NeuroImage* **9**(2): 195–207.  
644 <https://doi.org/10.1006/nimg.1998.0396>
- 645 Gramfort, A., Luessi, M., Larson, E., Engemann, D. A., Strohmeier, D., Brodbeck, C., ... &  
646 Hämäläinen, M. (2013a). MEG and EEG data analysis with MNE-Python. *Front Neurosci.* **7**: 267.  
647 <http://dx.doi.org/10.3389/fnins.2013.00267>
- 648 Gramfort, A., Strohmeier, D., Haueisen, J., Hämäläinen, M. S., & Kowalski, M. (2013b). Time-  
649 frequency mixed-norm estimates: Sparse M/EEG imaging with non-stationary source activations.  
650 *NeuroImage* **70**: 410–422. <http://dx.doi.org/10.1016/j.neuroimage.2012.12.051>
- 651 Gramfort, A., Luessi, M., Larson, E., Engemann, D. A., Strohmeier, D., Brodbeck, C., ... &  
652 Hämäläinen, M. S. (2014). MNE software for processing MEG and EEG data. *Neuroimage* **86**: 446–  
653 460. <http://dx.doi.org/10.1016/j.neuroimage.2013.10.027>
- 654 Gross, J., Kujala, J., Hämäläinen, M., Timmermann, L., Schnitzler, A., & Salmelin, R. (2001).  
655 Dynamic imaging of coherent sources: studying neural interactions in the human brain. *Proc Natl*  
656 *Acad Sci USA* **98**(2): 694–699. <http://dx.doi.org/10.1073/pnas.98.2.694>

- 657 Hall, M. B., Nissen, I. A., van Straaten, E. C., Furlong, P. L., Witton, C., Foley, E., ... & Hillebrand, A.  
658 (2018). An evaluation of kurtosis beamforming in magnetoencephalography to localize the  
659 epileptogenic zone in drug-resistant epilepsy patients. *Clin Neurophysiol.* **129**(6): 1221–1229.  
660 <http://dx.doi.org/10.1016/j.clinph.2017.12.040>
- 661 Hämäläinen, M., Hari, R., Lounasmaa, O. V., Knuutila, J., & Ilmoniemi, R. J. (1993).  
662 Magnetoencephalography-theory, instrumentation, and applications to noninvasive studies of the  
663 working human brain. *Rev Mod Phys* **65**: 413–497. <https://doi.org/10.1103/RevModPhys.65.413>
- 664 Hämäläinen, M. S., & Ilmoniemi, R. J. (1994). Interpreting magnetic fields of the brain: minimum  
665 norm estimates. *Med Biol Eng Compt.* **32**(1): 35–42. <https://doi.org/10.1007/BF02512476>
- 666 Hämäläinen, M. S., & Sarvas, J. (1989). Realistic conductivity geometry model of the human head  
667 for interpretation of neuromagnetic data. *IEEE Trans Biomed Eng.* **36**(2): 165–171.  
668 <https://doi.org/10.1109/10.16463>
- 669 Hillebrand, A., & Barnes, G. R. (2003). The use of anatomical constraints with MEG beamformers.  
670 *Neuroimage* **20**(4): 2302–2313. <http://dx.doi.org/10.1016/j.neuroimage.2003.07.031>
- 671 Hillebrand, A., & Barnes, G. R. (2005). Beamformer analysis of MEG data. *Int Rev Neurobiol* **68**:  
672 149–171. [http://dx.doi.org/10.1016/S0074-7742\(05\)68006-3](http://dx.doi.org/10.1016/S0074-7742(05)68006-3)
- 673 Huang, M. X., Mosher, J. C., & Leahy, R. M. (1999). A sensor-weighted overlapping-sphere head  
674 model and exhaustive head model comparison for MEG. *Phys Med Biol.* **44**(2): 423–440.  
675 <http://dx.doi.org/10.1088/0031-9155/44/2/010>
- 676 Ilmoniemi, R. J., Hämäläinen, M. S., & Knuutila, J. (1985). The forward and inverse problems in the  
677 spherical model, in: Weinberg, H., Stroink, G. & Katila, T. (Eds.), *Biomagnetism: Applications and*  
678 *Theory. Pergamon Press, New York, 278–282*
- 679 Ilmoniemi, R. J., & Sarvas, J. (2019). *Brain Signals: Physics and Mathematics of MEG and EEG.*  
680 *MIT Press.*
- 681 Ishii, R., Canuet, L., Ishihara, T., Aoki, Y., Ikeda, S., Hata, M., ... & Iwase, M. (2014). Frontal midline  
682 theta rhythm and gamma power changes during focused attention on mental calculation: an MEG  
683 beamformer analysis. *Front Hum Neurosci.* **8**: 406. <http://dx.doi.org/10.3389/fnhum.2014.00406>
- 684 Lin, F. H., Witzel, T., Zeffiro, T. A., & Belliveau, J. W. (2008). Linear constraint minimum variance  
685 beamformer functional magnetic resonance inverse imaging. *Neuroimage* **43**(2): 297–311.  
686 <http://dx.doi.org/10.1016/j.neuroimage.2008.06.038>
- 687 Litvak, V., Mattout, J., Kiebel, S., Phillips, C., Henson, R., Kilner, J., ... & Penny, W. (2011). EEG and  
688 MEG data analysis in SPM8. *Comput Intell Neurosci.* **2011**. <http://dx.doi.org/10.1155/2011/852961>

- 689 Mattout, J., Henson, R. N., & Friston, K. J. (2007). Canonical source reconstruction for MEG. *Comput*  
690 *Intell Neurosci.* **2007**. <http://dx.doi.org/10.1155/2007/67613>
- 691 Mosher, J. C., Lewis, P. S., & Leahy, R. M. (1992). Multiple dipole modeling and localization from  
692 spatio-temporal MEG data. *IEEE Trans Biomed Eng.* **39**(6): 541–557.  
693 <http://dx.doi.org/10.1109/10.141192>
- 694 Nenonen J, Nurminen J, Kicic D, Bikmullina R, Lioumis P, Jousmäki V, Taulu S, Parkkonen L,  
695 Putaala M, Kähkönen S (2012). Validation of head movement correction and spatiotemporal signal  
696 space separation in magnetoencephalography. *Clin Neurophysiol.* **123**(11): 2180–2191.  
697 <http://dx.doi.org/10.1016/j.clinph.2012.03.080>
- 698 Nolte, G. (2003). The magnetic lead field theorem in the quasi-static approximation and its use for  
699 magnetoencephalography forward calculation in realistic volume conductors. *Phys Med Biol.* **48**(22):  
700 3637. <http://dx.doi.org/10.1088/0031-9155/48/22/002>
- 701 Oostenveld, R., Fries, P., Maris, E., & Schoffelen, J. M. (2011). FieldTrip: open source software for  
702 advanced analysis of MEG, EEG, and invasive electrophysiological data. *Comput Intell Neurosci.*  
703 **2011**. <http://dx.doi.org/10.1155/2011/156869>
- 704 Pascual-Marqui, R. D., Michel, C. M., & Lehmann, D. (1994). Low resolution electromagnetic  
705 tomography: a new method for localizing electrical activity in the brain. *Int J Psychophysiol.* **18**(1):  
706 49-65. [https://doi.org/10.1016/0167-8760\(84\)90014-X](https://doi.org/10.1016/0167-8760(84)90014-X)
- 707 Robinson S.E., Vrba, J. (1998). Functional neuroimaging by synthetic aperture magnetometry  
708 (SAM), in: Yoshimoto, T., Kotani, M., Kuriki, S., Karibe, H. & Nakasato, N. (Eds.), Recent Advances  
709 in Biomagnetism. *Tohoku University Press, Japan*, 302–305.
- 710 Salmelin, R. (2010). Multi-dipole modeling in MEG, in: Hansen, P., Kringelbach, M. & Salmelin, R.  
711 (Eds.), MEG: an introduction to methods. *Oxford university press*, 124–155.  
712 <http://dx.doi.org/10.1093/acprof:oso/9780195307238.003.0006>
- 713 Sekihara, K., & Scholz, B. (1996). Generalized Wiener estimation of three-dimensional current  
714 distribution from biomagnetic measurements. *IEEE Trans Biomed Eng.* **43**(3): 281-291.  
715 <http://dx.doi.org/10.1109/10.486285>
- 716 Sekihara, K., Hild, K. E., & Nagarajan, S. S. (2006). A novel adaptive beamformer for MEG source  
717 reconstruction effective when large background brain activities exist. *IEEE Trans Biomed Eng.* **53**(9),  
718 1755–1764. <http://dx.doi.org/10.1109/TBME.2006.878119>
- 719 Sekihara, K., & Nagarajan, S., S. (2008). Adaptive spatial filters for electromagnetic brain imaging.  
720 *Springer Science & Business Media.* <https://doi.org/10.1007/978-3-540-79370-0>



- 721 Sekihara, K., Nagarajan, S. S., Poeppel, D., & Marantz, A. (2004). Asymptotic SNR of scalar and  
722 vector minimum-variance beamformers for neuromagnetic source reconstruction. *IEEE Trans*  
723 *Biomed Eng.* **51**(10): 1726–1734. <http://dx.doi.org/10.1109/TBME.2004.827926>
- 724 Spencer, M. E., Leahy, R. M., Mosher, J. C., & Lewis, P. S. (1992). Adaptive filters for monitoring  
725 localized brain activity from surface potential time series. in: *Conference Record of the Twenty-Sixth*  
726 *Asilomar Conference on Signals, Systems & Computers.* **1992**: 156-161.  
727 <http://dx.doi.org/10.1109/ACSSC.1992.269278>
- 728 Stenroos, M., Hunold, A., & Haueisen, J. (2014). Comparison of three-shell and simplified volume  
729 conductor models in magnetoencephalography. *NeuroImage* **94**: 337-348.  
730 <https://doi.org/10.1016/j.neuroimage.2014.01.006>
- 731 Tadel, F., Baillet, S., Mosher, J. C., Pantazis, D., & Leahy, R. M. (2011). Brainstorm: a user-friendly  
732 application for MEG/EEG analysis. *Comput Intell Neurosci.*, **2011**.  
733 <http://dx.doi.org/10.1155/2011/879716>
- 734 Taulu, S., & Kajola, M. (2005). Presentation of electromagnetic multichannel data: the signal space  
735 separation method. *J Appl Physics* **97**(12): 124905. <http://dx.doi.org/10.1063/1.1935742>
- 736 Tikhonov, A. N. (1963). Solution of incorrectly formulated problems and the regularization method.  
737 *Soviet Math.*, **4**: 1035–1038.
- 738 van Es, M. W., & Schoffelen, J. M. (2019). Stimulus-induced gamma power predicts the amplitude  
739 of the subsequent visual evoked response. *NeuroImage* **186**: 703-712.  
740 <http://dx.doi.org/10.1016/j.neuroimage.2018.11.029>
- 741 van Klink, N., van Rosmalen, F., Nenonen, J., Burnos, S., Helle, L., Taulu, S., ... & Hillebrand, A.  
742 (2017). Automatic detection and visualization of MEG ripple oscillations in epilepsy. *NeuroImage*  
743 *Clin* **15**: 689–701. <https://doi.org/10.1016/j.nicl.2017.06.024>
- 744 Van Veen, B. D., & Buckley, K. M. (1988). Beamforming: A versatile approach to spatial filtering.  
745 *IEEE ASSP Magazine* **5**(2): 4–24. <http://dx.doi.org/10.1109/53.665>
- 746 Van Veen, B. D., Van Drongelen, W., Yuchtman, M., & Suzuki, A. (1997). Localization of brain  
747 electrical activity via linearly constrained minimum variance spatial filtering. *IEEE Trans Biomed Eng.*  
748 **44**(9): 867–880. <http://dx.doi.org/10.1109/10.623056>
- 749 Vrba, J. (2000). Differences between synthetic aperture magnetometry (SAM) and linear  
750 beamformers. In: *Proceedings of the 12th International Conference on Biomagnetism, Espoo,*  
751 *Finland.* **2000**: 681-684

- 752 Wipf, D. P., Owen, J. P., Attias, H. T., Sekihara, K., & Nagarajan, S. S. (2010). Robust Bayesian  
753 estimation of the location, orientation, and time course of multiple correlated neural sources using  
754 MEG. *NeuroImage* **49**(1): 641–655. <http://dx.doi.org/10.1016/j.neuroimage.2009.06.083>
- 755 Youssofzadeh, V., Agler, W., Tenney, J. R., & Kadis, D. S. (2018). Whole-brain MEG connectivity-  
756 based analyses reveals critical hubs in childhood absence epilepsy. *Epilepsy Res.* **145**: 102-109.  
757 <http://dx.doi.org/10.1016/j.eplepsyres.2018.06.001>

|                                           | MNE-Python                                        | FieldTrip                                                      | SPM12 (DAiSS)                         | Brainstorm                                                              |
|-------------------------------------------|---------------------------------------------------|----------------------------------------------------------------|---------------------------------------|-------------------------------------------------------------------------|
| Version                                   | 0.18                                              | 20190922                                                       | 20190924                              | 20190926                                                                |
| Data import functions                     | MNE (Python)                                      | MNE (Matlab)                                                   | MNE (Matlab)                          | MNE (Matlab)                                                            |
| Internal units of MEG data                | T, T/m                                            | T, T/m                                                         | fT, fT/mm                             | T, T/m                                                                  |
| Band-pass filter type                     | FIR                                               | IIR                                                            | IIR                                   | FIR                                                                     |
| MRI segmentation                          | FreeSurfer                                        | SPM8/SPM12                                                     | SPM8/SPM12                            | FreeSurfer/SPM8                                                         |
| Head model                                | Single-shell BEM                                  | Single-shell corrected sphere                                  | Single-shell corrected sphere         | Overlapping spheres                                                     |
| Source space                              | Rectangular grid (5 mm)                           | Rectangular grid (5 mm)                                        | Rectangular grid (5 mm)               | Rectangular grid (5 mm)                                                 |
| MEG–MRI coregistration                    | Point-cloud co-registration and manual correction | 3-point manual co-registration followed by ICP co-registration | Point-cloud co-registration using ICP | Point-cloud co-registration using ICP                                   |
| Data covariance matrix                    | Sample data covariance                            | Sample data covariance                                         | Sample data covariance                | Sample data covariance                                                  |
| Noise normalization for NAI computation   | Sample noise covariance                           | Sample noise covariance                                        | Sample noise covariance               | Sample noise covariance                                                 |
| Combining data from multiple sensor types | Prewhitening (full noise covariance)              | No scaling or prewhitening                                     | No scaling or prewhitening            | Prewhitening (full noise covariance but cross-sensor-type terms zeroed) |
| Beamformer type                           | <b>Scalar</b>                                     | <b>Scalar</b>                                                  | <b>Scalar</b>                         | Vector                                                                  |
| Beamformer output                         | <b>Neural activity index (NAI)</b>                | <b>Neural activity index (NAI)</b>                             | <b>Neural activity index (NAI)</b>    | <b>Neural activity index (NAI)</b>                                      |

**Table 1.** Characteristics of the four beamforming toolboxes. The non-default settings of each toolbox are shown in bold. The toolbox version is indicated either by the version number or by the download date (yyyymmdd) from GitHub.

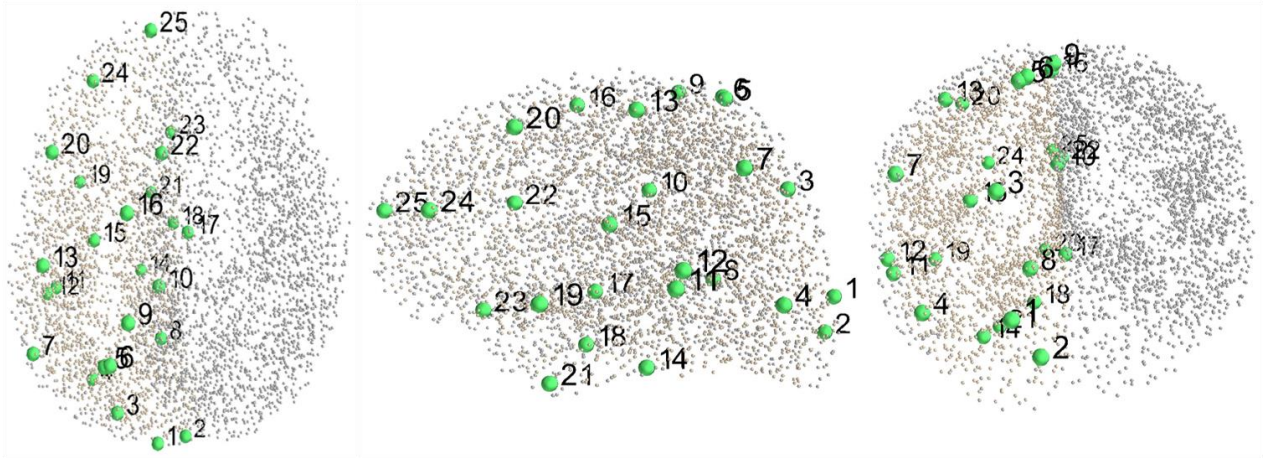

**Fig. 1.** The 25 simulated dipolar sources (green dots) in the source space (grey dots).

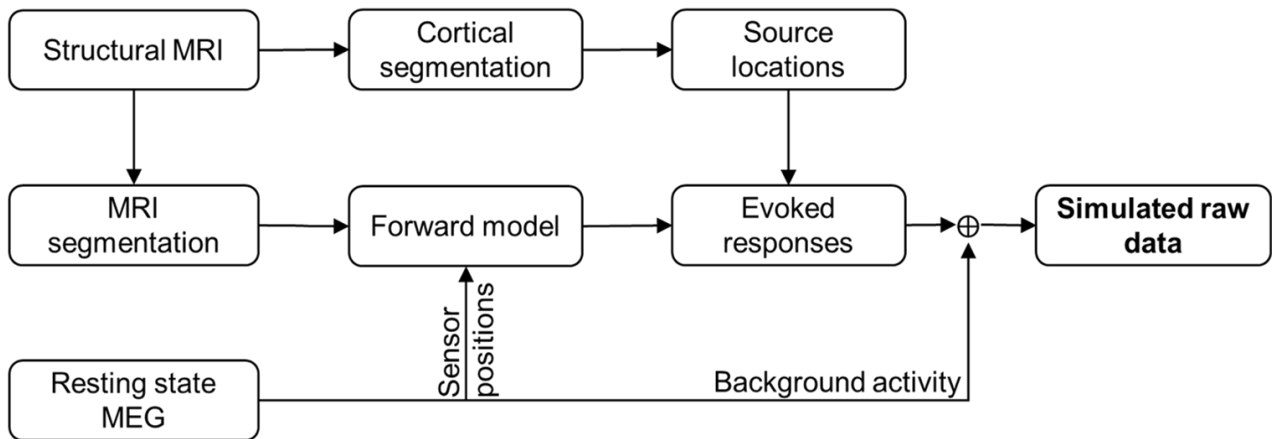

**Fig. 2.** Simulating MEG data (detailed workflow in Suppl. Fig. 1).

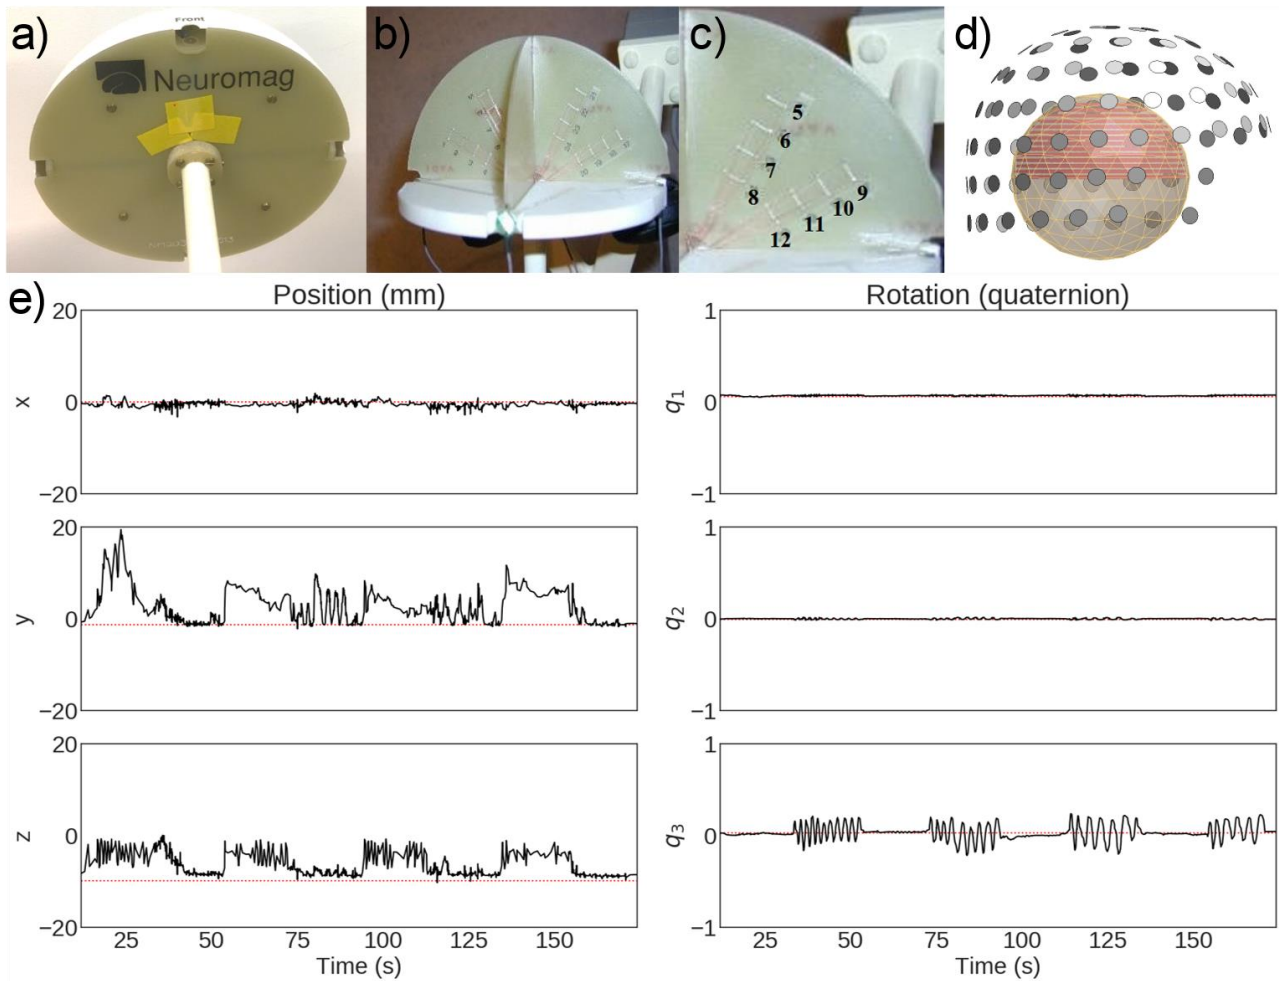

**Fig. 3.** The dry phantom measured in this study. (a) Outer view, (b) cross-section, (c) positions of the employed dipole sources, (d) phantom position with respect to the MEG sensor helmet, and (e) position and rotation of the phantom during one of the moving-phantom measurements (Dipole 9 activated).

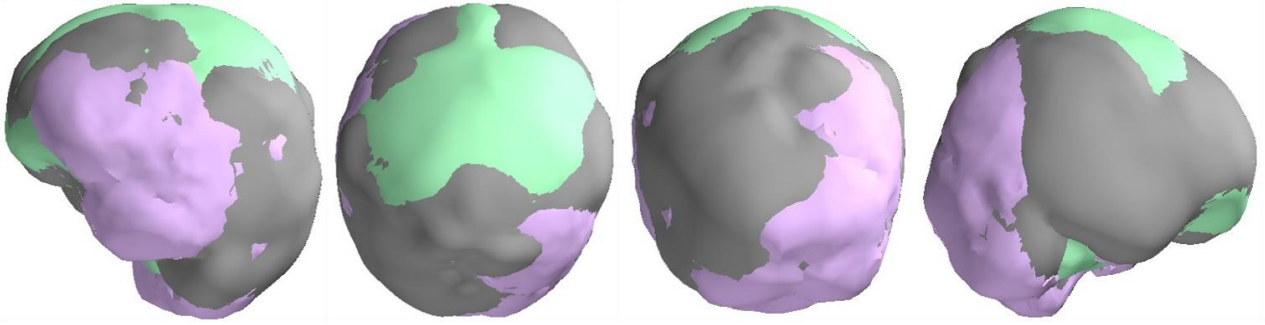

**Fig. 4:** Correspondence between the head models used by MNE-Python (grey), FieldTrip (lavender) and SPM12 (mint). The Brainstorm head model is not included here as it uses overlapping spheres. The outermost surface (inner skull) across the toolboxes is rendered visible.



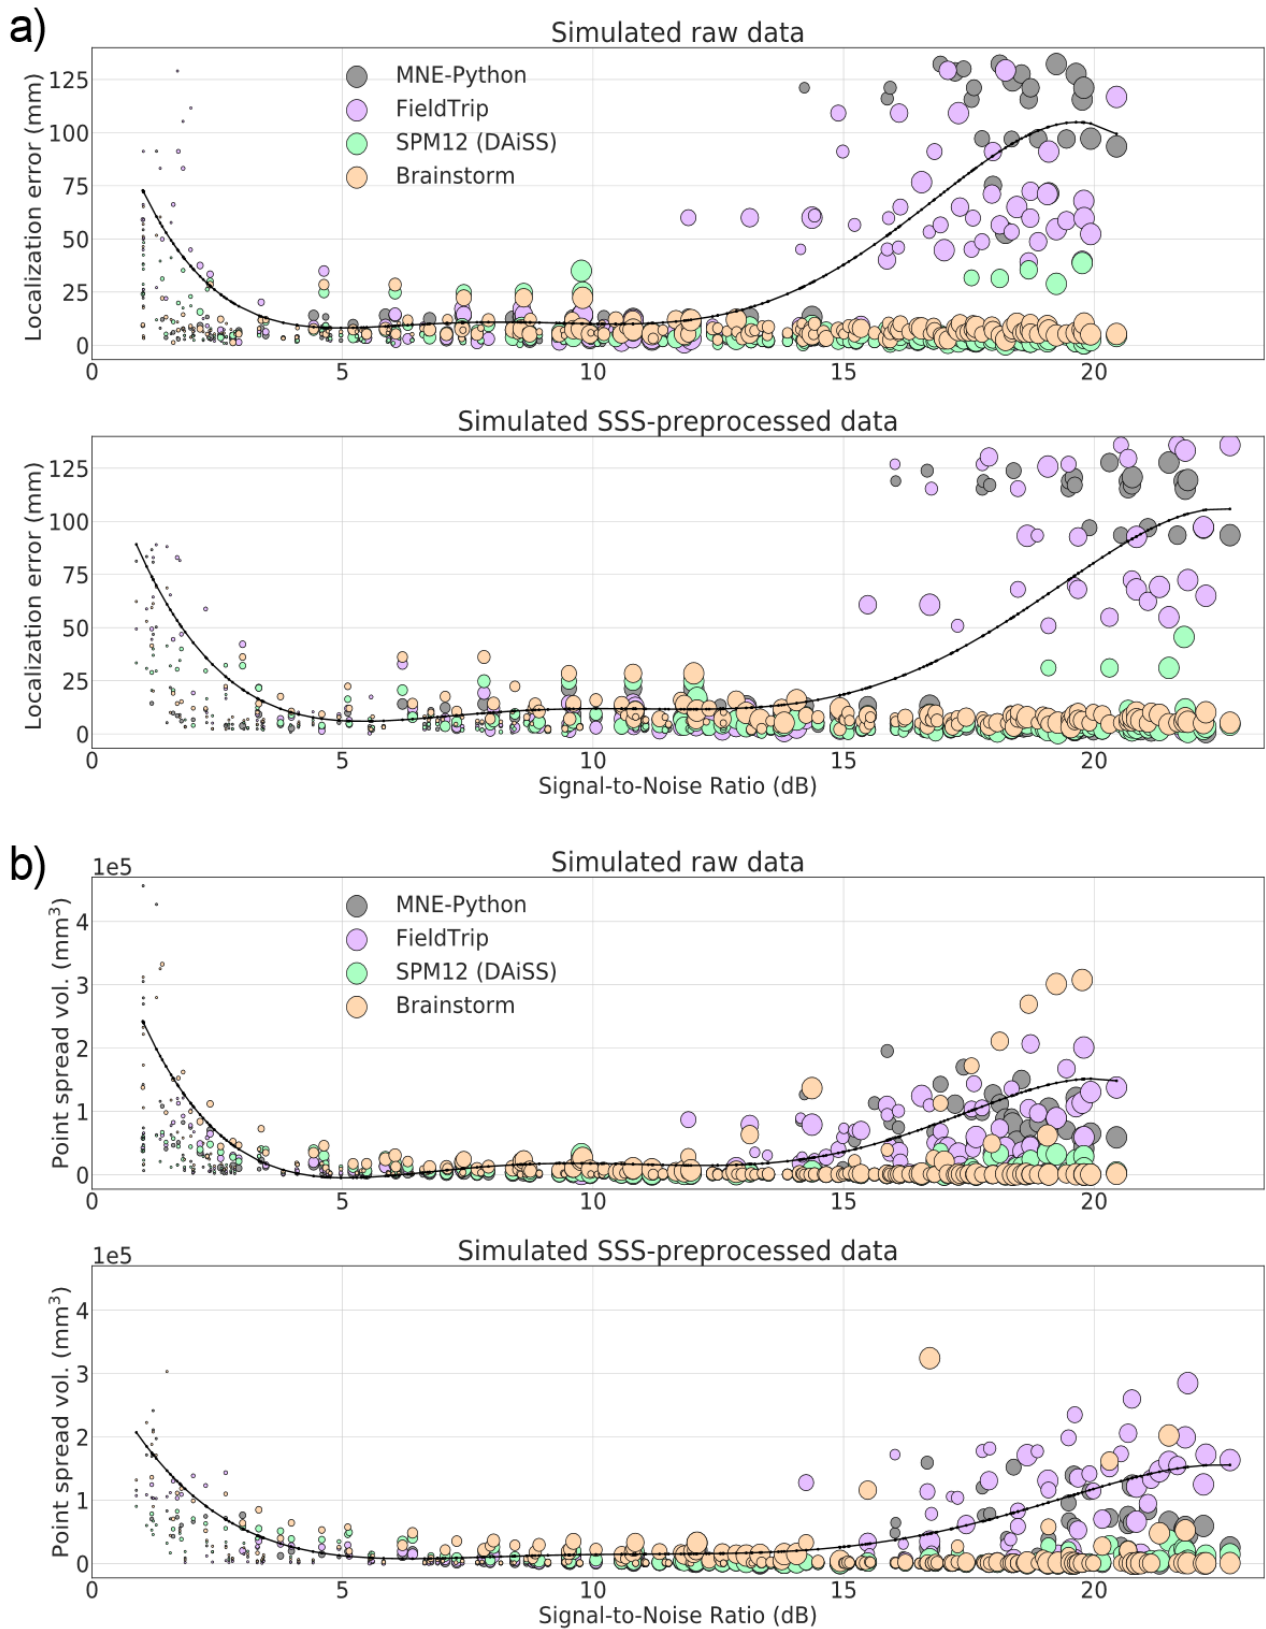

**Fig. 5.** Localization error (a) and point-spread volume (b) as a function of input SNR for raw and SSS-preprocessed simulated datasets. The markers size indicates the true dipole amplitude. The curves (black) indicate the polynomial regression of the maximal value across the four LCMV implementations.

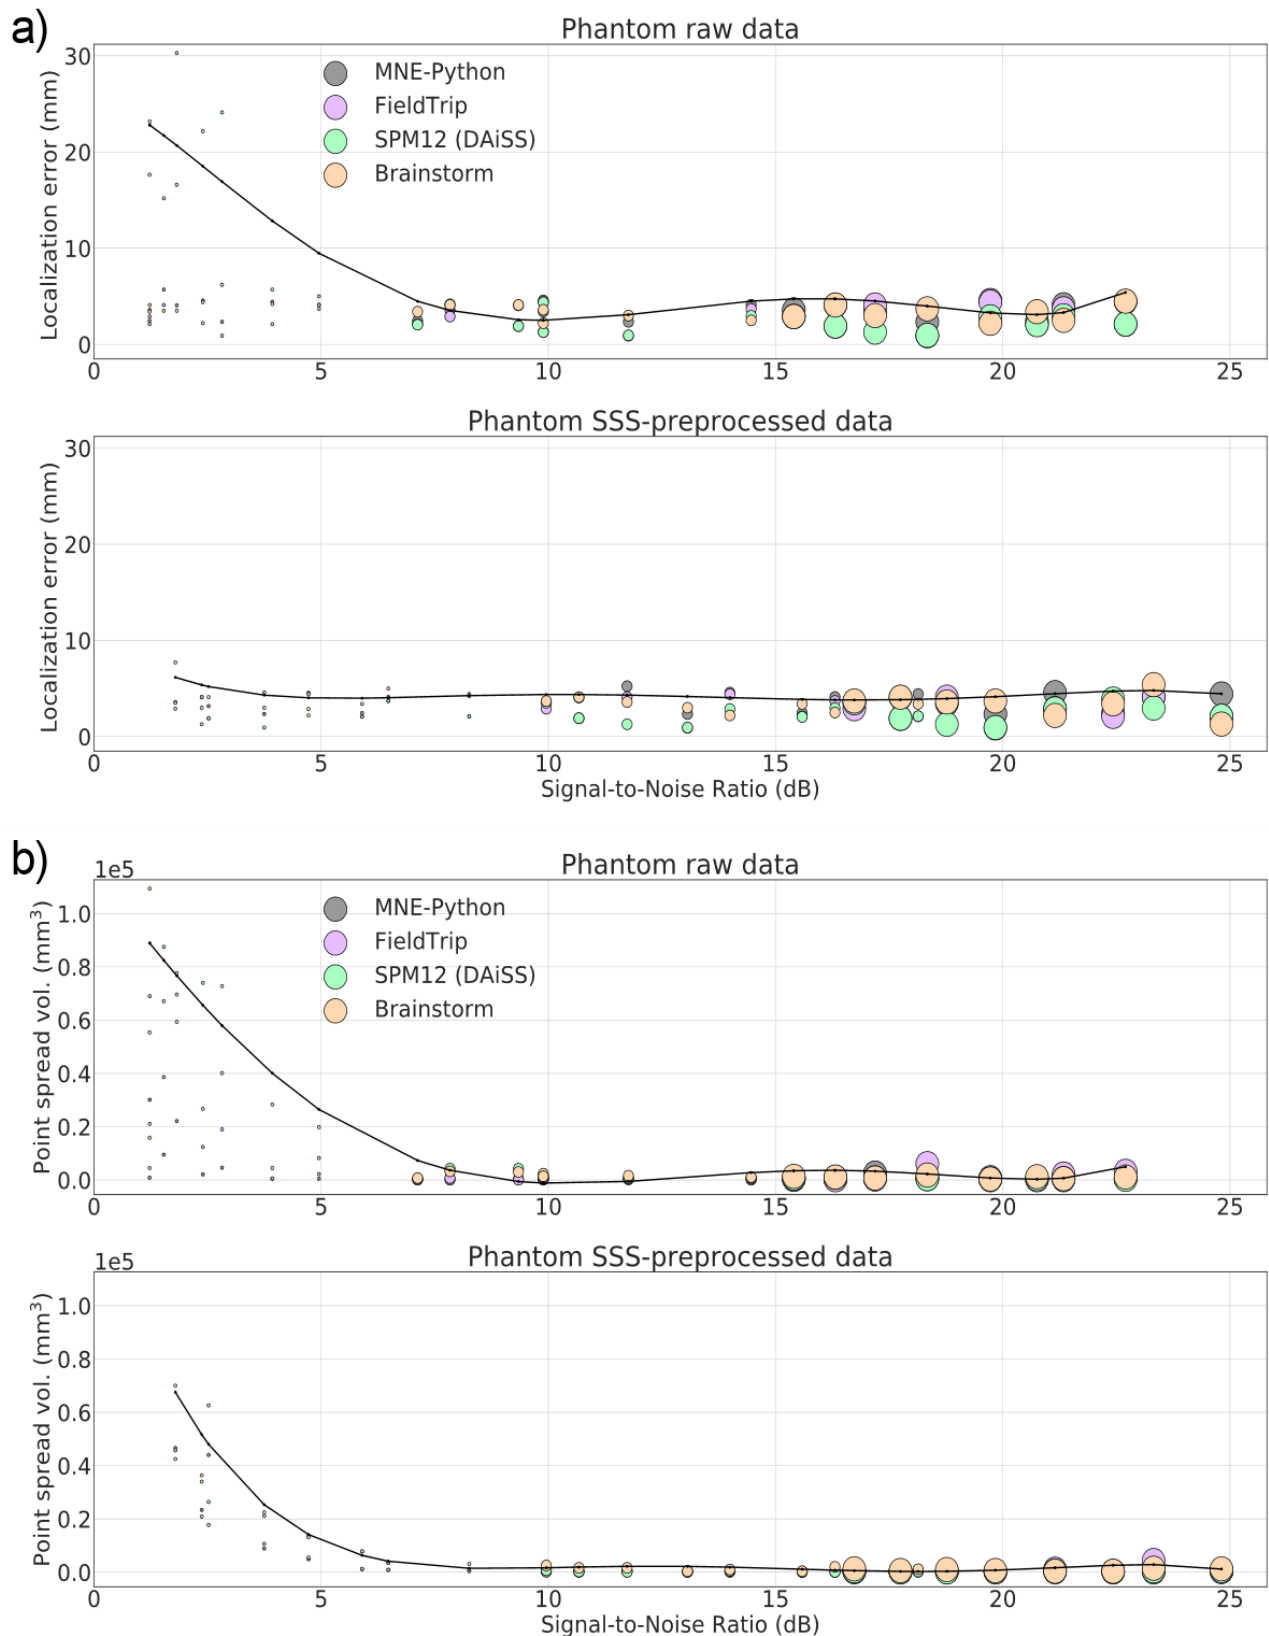

**Fig. 6.** Localization error (a) and point-spread volume (b) as a function of input SNR for phantom data recording in a stable position. The markers size indicates the true dipole amplitude. The curves (black) indicate the polynomial regression of the across the four LCMV implementations.

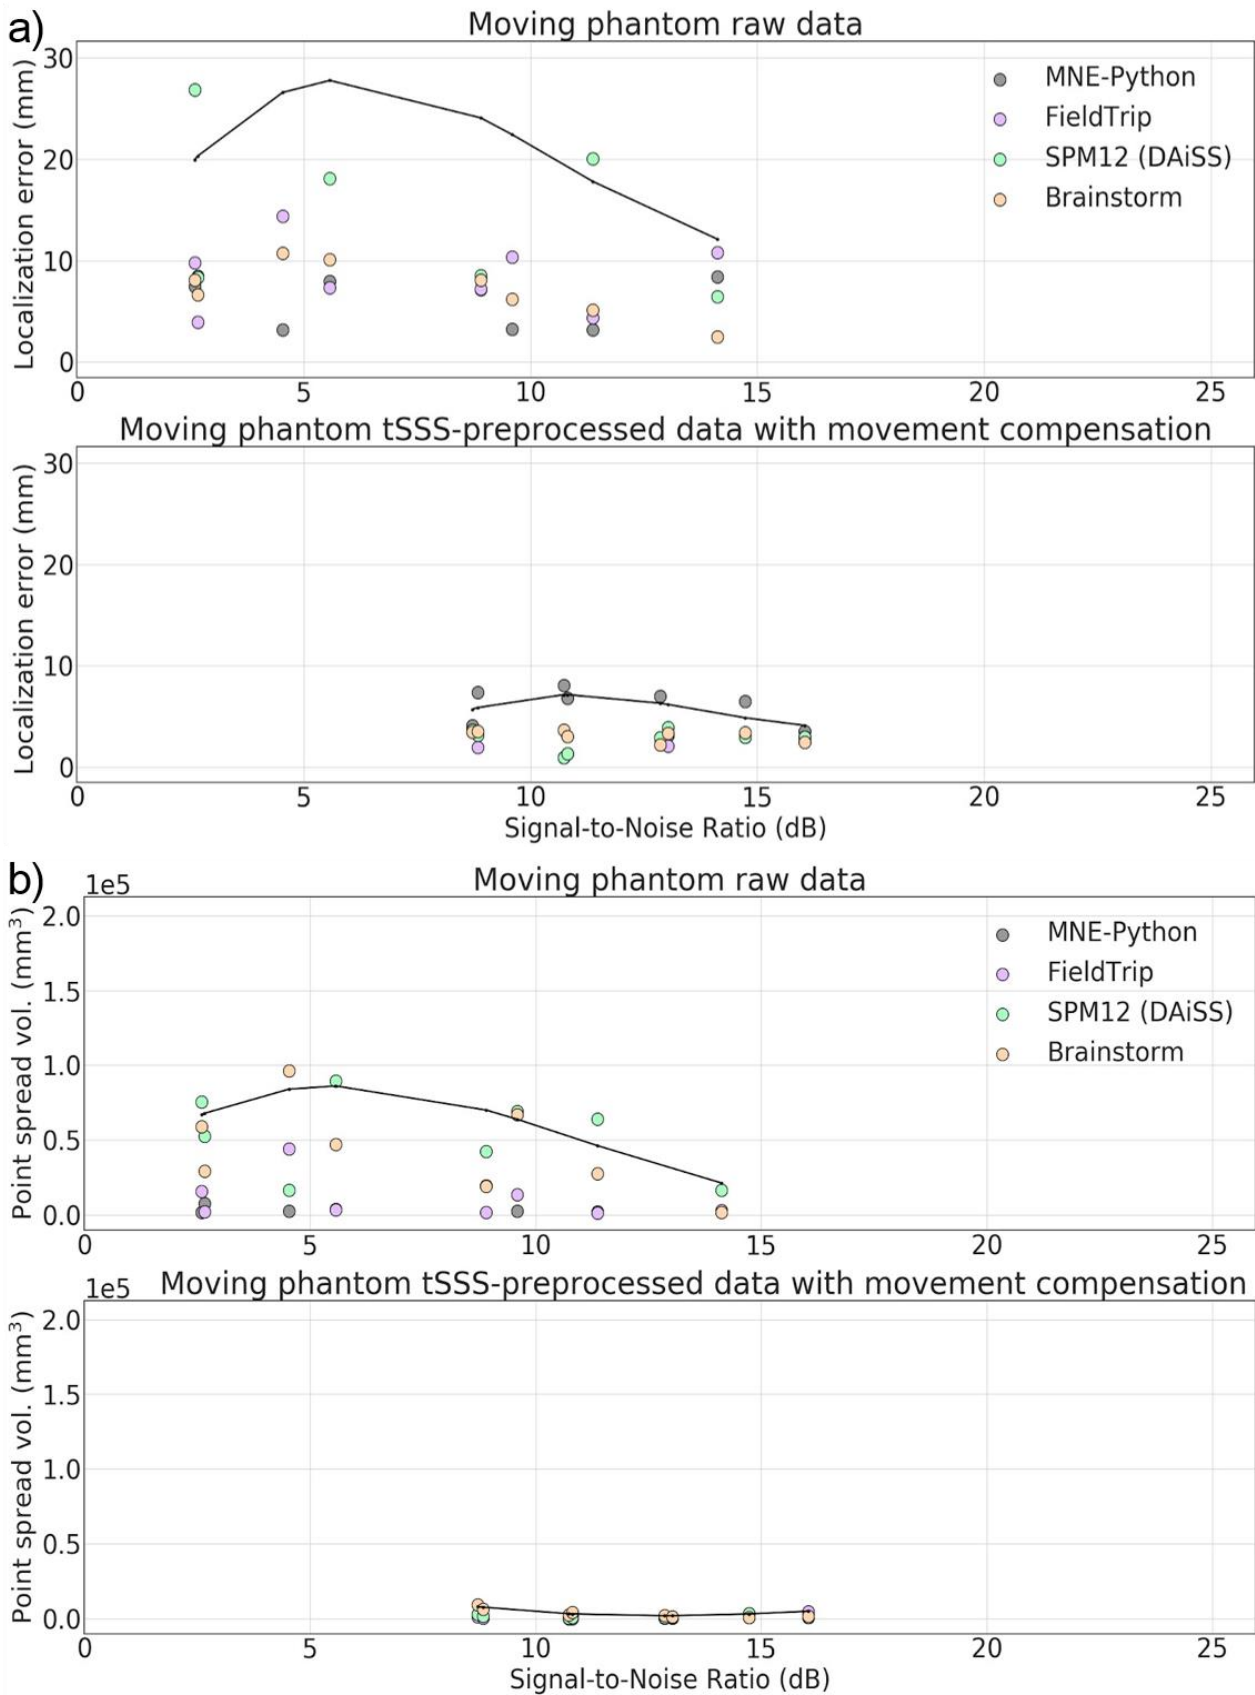

**Fig. 7.** Localization error (a) and point-spread volume (b) as a function of input SNR for data from the moving phantom. The curves (black) indicate the polynomial regression of the maximum value across the four LCMV implementations.

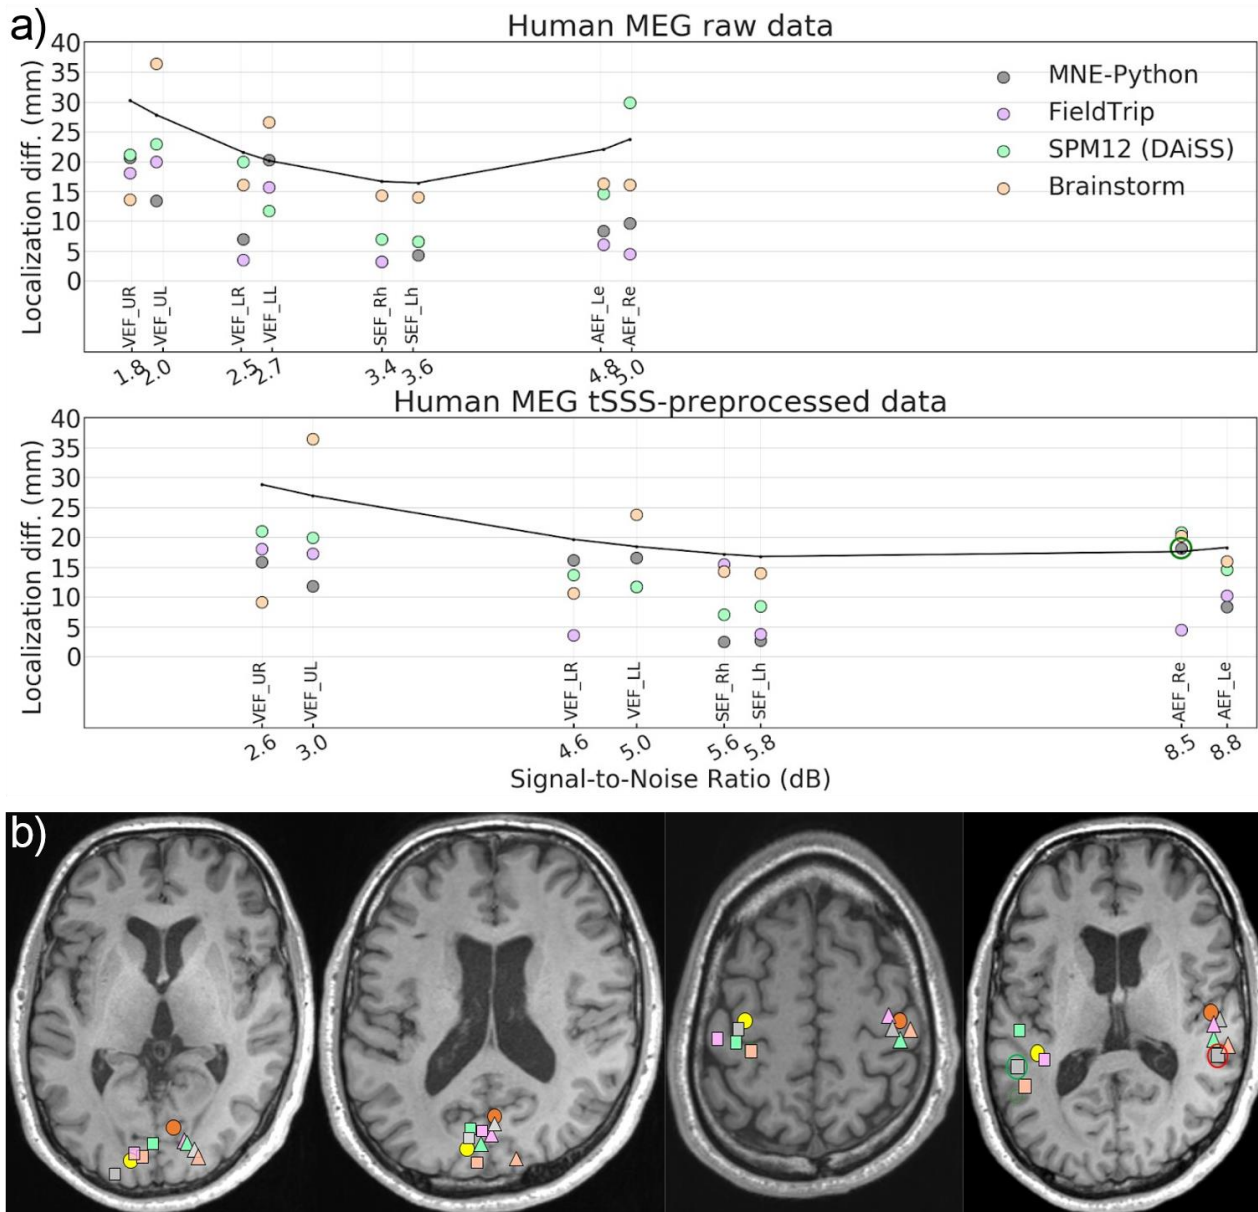

**Fig. 8.** Source estimates of human MEG data. (a) Localization difference from the reference dipole location for raw and tSSS-preprocessed data. (b) Peaks of the beamformer source estimate of tSSS-processed data. From left to right: visual stimuli presented to left (triangle) and right (square) upper and lower quadrant of the visual field (the two axial slices showing all sources); somatosensory stimuli to left (triangle) and right (square) wrist; auditory stimuli to the left (triangle) and right (square) ear. Reference dipole locations (yellow and orange circles).
